# Supplementary material
Source: PubMed Central journal article supplement (PMC1559449)
Supplement: bj3980577add.pdf [file bj3980577add.pdf]

## SUPPLEMENTARY FIGURES

### Supplementary Figure 1

**(A) DNA-sequence of mini-gp130-ELP:** normal print: cDNA coding for the LeB4-signal peptide, bold: cDNA coding for mini-gp130-ELP; Primer and restriction sites are indicated. The ATG start codon is underlined.

**(B) Protein sequence of mini-gp130-ELP.** Grey: LeB4-signal peptide; red: sgp130 domains 1-3; red, cursive: amino acid sequence determined by Edman-degradation of the mature purified mini-gp130-ELP; blue: c-myc-tag; green: 100 repeats of ELP; brown: ER-retention-signal.

### Supplementary Figure 2

#### Protein stability of purified mini-gp130-ELP at 37°C and 4°C.

**(A)** 1 µg purified mini-gp130-ELP was diluted in 1 ml PBS and incubated for 48 h at 37°C. Aliquots of originally 10 ng mini-gp130-ELP were separated by SDS/PAGE and blotted onto a PVDF membrane. Proteins were detected with the c-myc specific antibody 9E10 and visualized by ECL detection. Lane 1+2: 0 h; lane 3+4: 12 h; lane 5+6: 24 h; Lane 7+8: 48 h.

**(B)** 1 µg purified mini-gp130-ELP was diluted in 1 ml PBS and incubated for 26 d at 4°C. Aliquots of originally 10 ng mini-gp130-ELP were separated by SDS/PAGE and blotted onto a PVDF membrane. Proteins were detected with a c-myc specific antibody and visualized by ECL detection. Lane 1: 0 d; lane 2: 7 d; lane 3: 19 d; Lane 4: 26 d.

### Supplementary Figure 3

#### Expression of sgp130-variants in transgenic tobacco.

Leaves of transgenic lines were extracted in a mortar under liquid nitrogen in 50 mM Tris-HCl, 200 mM NaCl, 5 mM EDTA, 0.1% Tween 20, pH 8.0. The homogenate was centrifuged for 5 min at 4°C and 16,000 g. Proteins were separated on a 10% SDS polyacrylamide gel, blotted and c-myc-tag containing proteins were detected by Western blotting and ECL.

**(A)** Lane 1: 40 µg extract of sgp130Fc-ELP transgenic tobacco plants; lane 2: 40 µg extract of sgp130Fc transgenic tobacco plants; lane 3: 40 ng c-myc-tagged scFv control protein. M: molecular mass marker (kDa).

**(B)** Lane 1: 5 µg extract of mini-gp130-ELP transgenic tobacco plants; lane 2: 5 ng control protein; lane 3: 10 ng c-myc-tagged single chain Fv control protein; lane 4: 5 µg extract of mini-gp130-ELP transgenic tobacco plants. M: molecular mass marker (kDa).

**Supplementary Figure 4 Calibration of size exclusion chromatography.**

**(A)** For calibration the high molecular mass standard from Amersham Pharmacia Biotech was used. Peak 1: Thyroglobin 669 kD; Peak 2: Ferritin 490 kDa; Peak 3: Katalase 232 kDa; Peak 4: Aldolase 158 kDa.

**(B)** The known molecular masses of the purchased standard proteins and their respective elution volumes were subject to linear regression.

**Supplementary Figure 5 Absorption spectra of pure mini-gp130-ELP**

**(A)** The absorption spectrum of purified mini-gp130-ELP was recorded in the range of 240-320 nm.

**(B)** The protein concentration of purified mini-gp130-ELP (after inverse transition cycling and size exclusion chromatography) was calculated as indicated from the absorption at 280 nm.

# Supplementary Figure 1

**A**

1 ATGGCTTCCA AACCTTTTCT ATCTTTGCTT TCAC~~TT~~TCCT TGCTTCTCTT

Primer: 5'gp130-Δsignal →

AflIII

51 TACAAGCACA TGT~~TT~~AGCAG AGCTGCTGGA TCCTTGCGGC TATATCTCCC  
101 CTGAGTCTCC TGTGGTGCAG CTGCATTCTA ACTTCACCGC CGTGTGTGTG  
151 CTGAAGGAAA AGTGCATGGA C~~T~~ACTTCCAC GTGAACGCCA ACTACATCGT  
201 GTGGAAAACC AACCACTTCA CCATCCCCAA GGAGCAGTAC ACCATCATCA  
251 ACCGGACCGC TTCTTCTGTG ACCTTCACCG ATATCGCCTC CCTGAATATC  
301 CAGCTGACCT GCAACATCCT GACCTTTGGA CAGCTGGAGC AGAATGTGTA  
351 CGGCATCACC ATCATCTCTG GCCTGCCTCC AGAGAAGCCT AAGAACCTGT  
401 CCTGCATCGT GAATGAGGGC AAGAAGATGA GGTGTGAGTG GGATGGCGGC  
451 AGAGAGACAC ATCTGGAGAC CAACTTCACC CTGAAGTCTG AGTGGGCCAC  
501 CCACAAGTTT GCCGACTGCA AGGCCAAGAG AGATACCCTT ACCTCTTGCA  
551 CCGTGGACTA CTCCACCGTG TACTTCGTGA ACATCGAGGT GTGGGTGGAG  
601 GCTGAGAATG CTCTGGGCAA GGTGACCTCT GACCACATCA ACTTCGACCC  
651 CGTGTACAAG GTGAAGCCTA ACCCTCCTCA CAACCTGTCC GTGATCAACT  
701 CTGAGGAGCT GTCCTCTATC CTGAAGCTGA CCTGGACCAA CCTTCCATC  
751 AAGTCCGTGA TCATCTGAA GTACAACATC CAGTACAGGA CCAAGGATGC  
801 TTCTACCTGG TCTCAGATCC CTCTGAGGA TACCGCTTCC ACCAGATCCA  
851 GCTTCACAGT GCAGGACCTG AAGCCTTTTA CCGAGTACGT GTTCAGGATC  
901 CGGTGCATGA AGGAGGATGG CAAGGGCTAT TGGTCTGACT GGTCTGAGGA

Primer: 3'gp130-NaeI ←

NaeI

951 GGCTTCTGGC ATCACCTACG AGGACAGAGC CCGCGGACAA GCGGCCGAG  
1001 AACAAAAACT CATCTCAGAA GAGGATCTGA ATGGGGCCGT CGAGATGGGC  
1051 CACGGCGTGG GTGTTCCGGG CGTGGGTGTT CCGGGTGGCG GTGTGCCGGG  
1101 CGCAGGTGTT CCTGGTGTAG GTGTGCCGGG TGTGGGTGTG CCGGGTGTG  
1151 GTGTACCAGG TGGCGGTGTT CCGGGTGCAG GCGTTCGGG TGGCGGTGTG  
1201 CCGGGCGTGG GTGTTCCGGG CGTGGGTGTT CCGGGTGGCG GTGTGCCGGG  
1251 CGCAGGTGTT CCTGGTGTAG GTGTGCCGGG TGTGGGTGTG CCGGGTGTG  
1301 GTGTACCAGG TGGCGGTGTT CCGGGTGCAG GCGTTCGGG TGGCGGTGTG  
1351 CCGGGCGTGG GTGTTCCGGG CGTGGGTGTT CCGGGTGGCG GTGTGCCGGG  
1401 CGCAGGTGTT CCTGGTGTAG GTGTGCCGGG TGTGGGTGTG CCGGGTGTG  
1451 GTGTACCAGG TGGCGGTGTT CCGGGTGCAG GCGTTCGGG TGGCGGTGTG  
1501 CCGGGCGTGG GTGTTCCGGG CGTGGGTGTT CCGGGTGGCG GTGTGCCGGG  
1551 CGCAGGTGTT CCTGGTGTAG GTGTGCCGGG TGTGGGTGTG CCGGGTGTG  
1601 GTGTACCAGG TGGCGGTGTT CCGGGTGCAG GCGTTCGGG TGGCGGTGTG  
1651 CCGGGCGTGG GTGTTCCGGG CGTGGGTGTT CCGGGTGGCG GTGTGCCGGG  
1701 CGCAGGTGTT CCTGGTGTAG GTGTGCCGGG TGTGGGTGTG CCGGGTGTG  
1751 GTGTACCAGG TGGCGGTGTT CCGGGTGCAG GCGTTCGGG TGGCGGTGTG  
1801 CCGGGCGTGG GTGTTCCGGG CGTGGGTGTT CCGGGTGGCG GTGTGCCGGG  
1851 CGCAGGTGTT CCTGGTGTAG GTGTGCCGGG TGTGGGTGTG CCGGGTGTG  
1901 GTGTACCAGG TGGCGGTGTT CCGGGTGCAG GCGTTCGGG TGGCGGTGTG  
1951 CCGGGCGTGG GTGTTCCGGG CGTGGGTGTT CCGGGTGGCG GTGTGCCGGG  
2001 CGCAGGTGTT CCTGGTGTAG GTGTGCCGGG TGTGGGTGTG CCGGGTGTG  
2051 GTGTACCAGG TGGCGGTGTT CCGGGTGCAG GCGTTCGGG TGGCGGTGTG  
2101 CCGGGCGTGG GTGTTCCGGG CGTGGGTGTT CCGGGTGGCG GTGTGCCGGG  
2151 CGCAGGTGTT CCTGGTGTAG GTGTGCCGGG TGTGGGTGTG CCGGGTGTG  
2201 GTGTACCAGG TGGCGGTGTT CCGGGTGCAG GCGTTCGGG TGGCGGTGTG  
2251 CCGGGCGTGG GTGTTCCGGG CGTGGGTGTT CCGGGTGGCG GTGTGCCGGG  
2301 CGCAGGTGTT CCTGGTGTAG GTGTGCCGGG TGTGGGTGTG CCGGGTGTG  
2351 GTGTACCAGG TGGCGGTGTT CCGGGTGCAG GCGTTCGGG TGGCGGTGTG  
2401 CCGGGCGTGG GTGTTCCGGG CGTGGGTGTT CCGGGTGGCG GTGTGCCGGG  
2451 CGCAGGTGTT CCTGGTGTAG GTGTGCCGGG TGTGGGTGTG CCGGGTGTG  
2501 GTGTACCAGG TGGCGGTGTT CCGGGTGCAG GCGTTCGGG TGGCGGTGTG  
2551 CCGGGCGGGC TGGCGGCCGC AGAACCCAAA GACGA~~ACT~~CT AG

# Supplementary Figure 1

**B**

cleavage site of the signal peptide

LeB4-signal peptide ↓ **sgp130-ELP**

MASKPFLSLLSLSLLLFTSTCLA**ELLDP**CGYISPESPVVQLHSNFTAVCV 50  
LKEKCMDYFHVNANYIVWKTNHFTI**PKEQYTI**INRTASSVTF**TDIASLNI** 100  
QLTCNILTFGQLEQNVYGITII**SGLPPEKPKNLS**CI**VNEGKMRCEWDGG** 150  
RETHLETNFTL**KSEWATHKFADCKAKRDTPT**SCTVDY**STVYFVNIEVWVE** 200  
AENALGKVTS**SDHINFDPVYKVKPNPPHNSV**INSEELSSIL**KLWTNPSI** 250  
KSVIILK**YNIQYRTKDASTWSQIPPEDTAS**TRSSFT**VQDLKPFTEYVFRI** 300  
RCMKEDGK**YWSDWSEEASGITYEDR**AGGQAA**AEQKLI**SEED**LNGAVEMG** 350  
HG**VGPVGPVGP**GGG**VPAGVPGVGPVGPVGPVGPVGP**GGG**VPAGVPGGGV** 400  
PGVGPVGPVGPGGG**VPAGVPGVGPVGPVGPVGPVGP**GGG**VPAGVPGGGV** 450  
PGVGPVGPVGPGGG**VPAGVPGVGPVGPVGPVGPVGP**GGG**VPAGVPGGGV** 500  
PGVGPVGPVGPGGG**VPAGVPGVGPVGPVGPVGPVGP**GGG**VPAGVPGGGV** 550  
PGVGPVGPVGPGGG**VPAGVPGVGPVGPVGPVGPVGP**GGG**VPAGVPGGGV** 600  
PGVGPVGPVGPGGG**VPAGVPGVGPVGPVGPVGPVGP**GGG**VPAGVPGGGV** 650  
PGVGPVGPVGPGGG**VPAGVPGVGPVGPVGPVGPVGP**GGG**VPAGVPGGGV** 700  
PGVGPVGPVGPGGG**VPAGVPGVGPVGPVGPVGPVGP**GGG**VPAGVPGGGV** 750  
PGVGPVGPVGPGGG**VPAGVPGVGPVGPVGPVGPVGP**GGG**VPAGVPGGGV** 800  
PGVGPVGPVGPGGG**VPAGVPGVGPVGPVGPVGPVGP**GGG**VPAGVPGGGV** 850  
PGGLAA**AEPKDEL\***

# Supplementary Figure 2

**A**

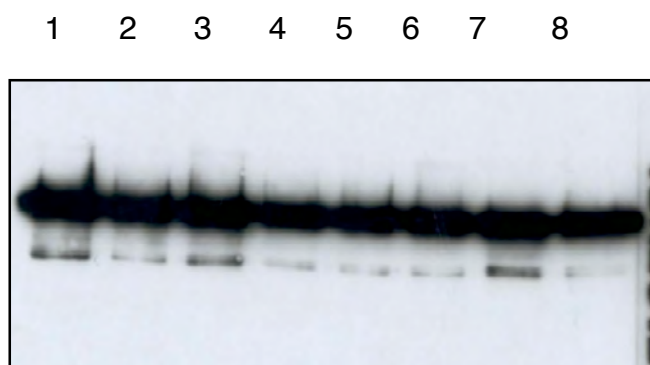

**B**

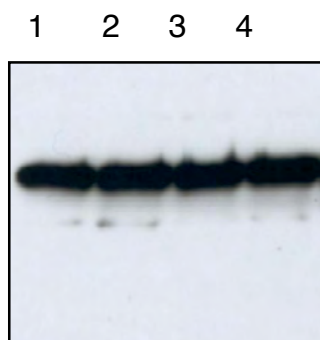

# Supplementary Figure 3

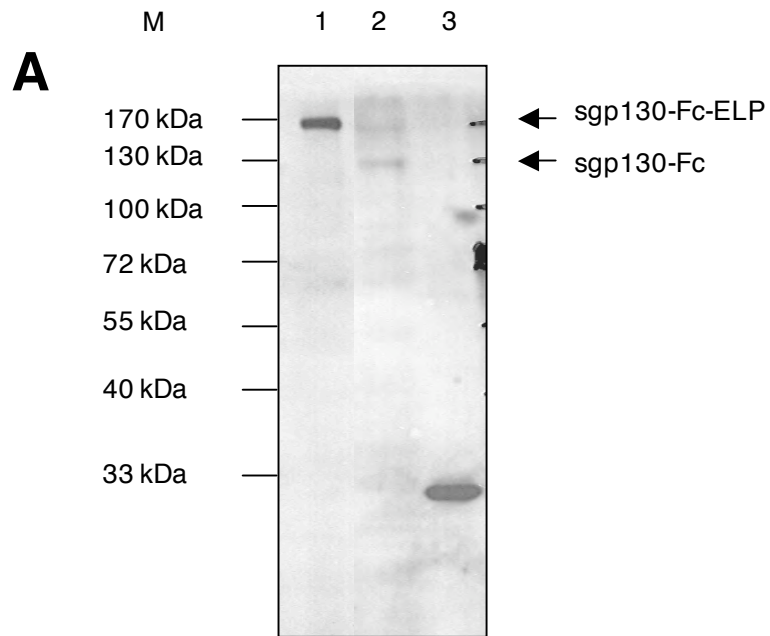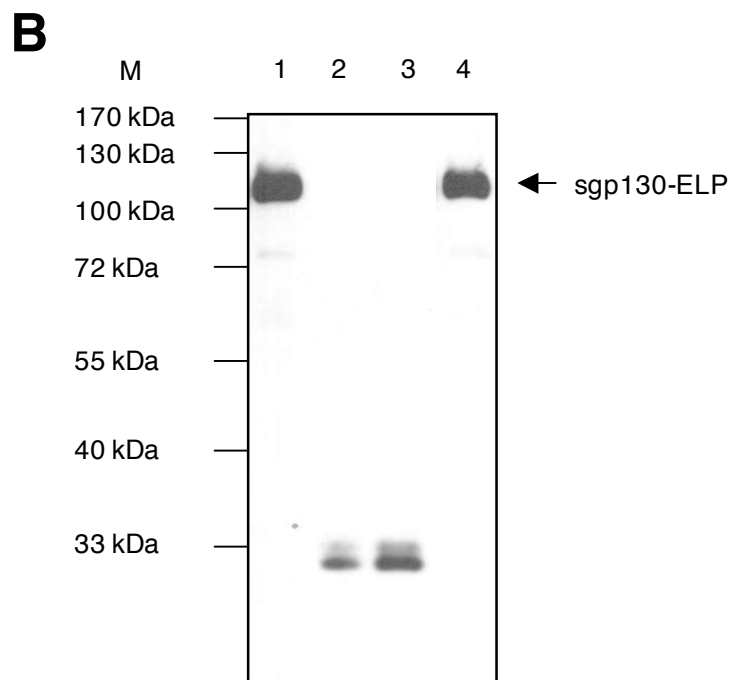

# Supplementary Figure 4

**A**

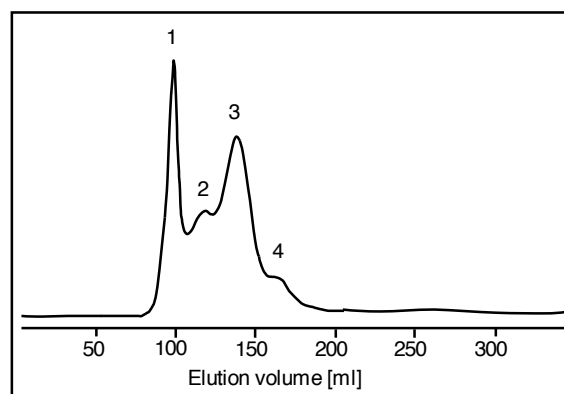

**B**

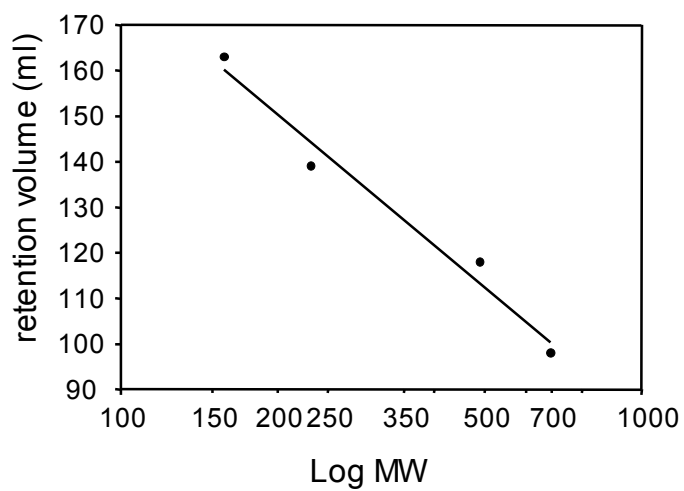

$$y = -95.5x + 370.1$$

$$r^2 = 0.973$$

# Supplementary Figure 5

**A**

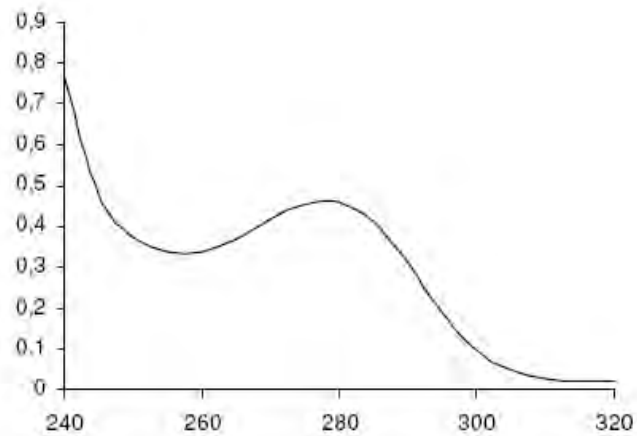

| nm  | Abs   |
|-----|-------|
| 240 | 0,766 |
| 245 | 0,478 |
| 250 | 0,374 |
| 255 | 0,336 |
| 260 | 0,339 |
| 265 | 0,37  |
| 270 | 0,417 |
| 275 | 0,455 |
| 280 | 0,458 |
| 285 | 0,413 |
| 290 | 0,316 |
| 295 | 0,199 |
| 300 | 0,098 |
| 305 | 0,048 |
| 310 | 0,029 |
| 315 | 0,022 |
| 320 | 0,021 |

**B**

$$c = \frac{0.458 \times 100,000 \text{ g/mol}}{64,890 \text{ l/cm} \times \text{mol} \times 1 \text{ cm}} = 0.705 \text{ mg/ml}$$
